# Supplementary material for: Rosmarinic Acid Alleviates the Endothelial Dysfunction Induced by Hydrogen Peroxide in Rat Aortic Rings via Activation of AMPK
Source: PubMed Central journal article supplement (PMC5572610; doi:10.1155/2017/7091904), 2017-08-13
Supplement: 7091904.f1.pdf [file 7091904.f1.pdf]

## Supplementary data

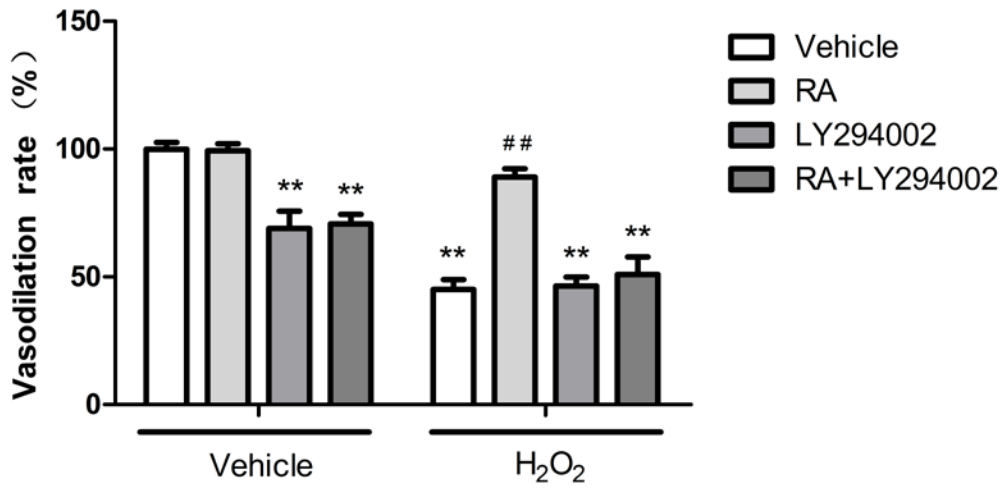

**Fig 1S. The influence of Akt level in the protection of RA against H<sub>2</sub>O<sub>2</sub>-induced endothelial dysfunction in aorta rings.** The rat aorta was pretreated with LY294002, RA for 10 min, added H<sub>2</sub>O<sub>2</sub> for another 10 min. RA (50  $\mu$ M, 10 min) has improved endothelial dysfunction in H<sub>2</sub>O<sub>2</sub>-induced rats, but the effects were partly suppressed by Akt inhibitor (LY294002, 25  $\mu$ M). The vasodilation was assessed by exposure acetylcholine (ACh) (n=6). \*\*  $P < 0.01$  vs control group. ##  $P < 0.01$  vs H<sub>2</sub>O<sub>2</sub> group.

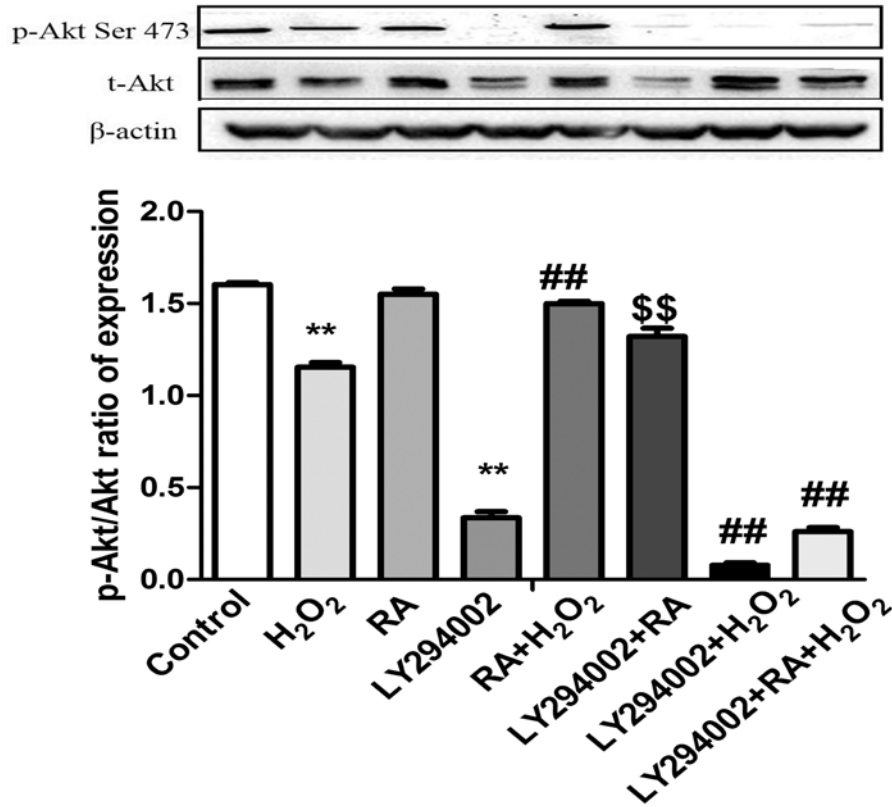

**Fig. 2S** The influence of Akt level in the protection of RA against H<sub>2</sub>O<sub>2</sub>-induced endothelial dysfunction in HAEC. t the HAEC were pretreated with the Akt inhibitor Ly294002(25 μM) 10 min prior to incubation for an additional 10 min with RA (50 μM) and H<sub>2</sub>O<sub>2</sub> (5 mM). Phosphor-Akt, Akt levels were determined by western blot. The quantifications of the related phosphor-Akt, Akt are shown. The values are presented as the means ± SD, \*\* *P*<0.01 vs control group, ## *P*<0.01 vs H<sub>2</sub>O<sub>2</sub> group. \$\$ *P*<0.01 vs RA group.

## Materials and Methods

### Chemicals

Rosmarinic acid, acetylcholin (ACh), Compound C, 5-Aminoimidazole-4-carboxamide-1- $\beta$ -D-ribofuranoside (AICAR), LY294002 were purchased from Sigma Chemical Co (St. Louis, MO, USA); phenylephrine (PE) and *l*-N-nitro arginine methyl ester (L-NAME) was purchased from Aladdin Industrial Co (Shanghai, China). The other reagents were of analytical purity. Akt inhibitor LY294002 was dissolved in dimethyl sulfoxide (DMSO) Polyclonal antibodies against AMPK, phosphor-AMPK(Thr172) Akt, phospho-Akt (Ser473), were obtained from Cell Signaling Technology (Beverly, Mass), eNOS, phospho-eNOS (Ser1177) were purchased from Abcam.

### Endothelial dysfunction induced by H<sub>2</sub>O<sub>2</sub> and the RA treatment in rat aortic rings

After 10 min equilibration with new K-H solution, the aortic rings were pretreated with various concentrations of H<sub>2</sub>O<sub>2</sub> (2.5, 5.0 and 10.0 mM) for 10 min. Following washout of H<sub>2</sub>O<sub>2</sub> the aortic rings was depolarized with 80 mM KCl for 2 times. After returning to baseline tension, rings were allowed to equilibrate for 20 min and then the contraction were induced with PE (1 $\mu$ M) till a stable plateau in tension. Then each ring was exposed to increasing concentration of ACh (10<sup>-3</sup>, 10<sup>-2</sup>, 10<sup>-1</sup>, 1, 5, 10, 50  $\mu$ M) to generate dose-dependent relaxation response. In the RA intervention effect investigation, the aortic rings were incubated with various concentrations (50.0  $\mu$ M, 25  $\mu$ M, 12.5  $\mu$ M) of RA 10 min prior to exposure to 5 mM H<sub>2</sub>O<sub>2</sub>. Thereafter, a second vasodilation reactivity to ACh was obtained to evaluate the integrity of the endothelium after PE-induced contraction. In order to investigate the roles Akt and AMPK in H<sub>2</sub>O<sub>2</sub> induced endothelium dysfunction, the aortic rings were separately pretreated for 10 min with two inhibitors of Compound C and LY294002 before the exposure to H<sub>2</sub>O<sub>2</sub> (5 mM).

### Cell culture and treatment

HAEC (Human aortic endothelial cells) were purchased from Thermo Fisher Scientific Inc. and cultured in Dulbecco's Modified Eagle Medium (GIBCO) supplemented with L-glutamine, pyridoxine hydrochloride, 110 mg/L sodium pyruvate and penicillin. Streptomycin and amphotericin at 37 °C in a humidified atmosphere of 5% CO<sub>2</sub>. Cells cultured up to six or fewer passages were first grown to confluence before exposure to H<sub>2</sub>O<sub>2</sub> (5 mM) for 10 min, and stimulated by RA (50  $\mu$ M) containing H<sub>2</sub>O<sub>2</sub> (5 mM) for 10 min, to clarify the activity of AMPK on the

expression of the phosphor-eNOS. Therefore, cells were treated with Compound C (inhibitor of AMPK) with H<sub>2</sub>O<sub>2</sub>, and in the presence of RA for 10 min. Next, in order to see if rosmarinic acid-mediated Akt activation was responsible for the enhancement of eNOS phosphorylation, cells were treated with LY294002 (Akt inhibitor) in the presence of rosmarinic acid found that LY294002 completely abrogated rosmarinic acid-mediated increase in Akt phosphorylation.

### **Western blotting analysis**

After lysis of the cells, the protein samples (25 µg/lane) were resolved by electrophoresis on 10% sodium dodecyl sulfate (SDS)-polyacrylamide gels and then transferred to nitrocellulose membranes. The membranes were incubated in blocking buffer and then incubated with more of the following primary antibodies. Anti-AMPK (1 : 1000, Cell signaling, MA, USA), anti-phospho-AMPK (Thr 172) (1 : 1000, Cell signaling), anti-phospho-Akt(ser 473)(1:1000, Cell signaling), anti-Akt(1:1000, Cell signaling), anti-phospho endothelial nitric oxide synthase (eNOS, ser 1177), anti-endothelial nitric oxide synthase (1 : 1000, Cell signaling). Thereafter, the membranes were washed and incubated with horseradish peroxidase-conjugated secondary antibodies. (1 : 2000, Cell signaling).

### **Results**

#### **Akt level was involved in the protection of Rosmarinic acid in aorta rings.**

As presented in Fig. 6, H<sub>2</sub>O<sub>2</sub>-induced aorta relaxation responses were obviously attenuated in rings compared with control. Treatment with Rosmarinic acid (50 µM) significantly improved H<sub>2</sub>O<sub>2</sub>-induced vasoconstriction in aortic rings. The nicer effect of Rosmarinic acid (50 µM) on vasodilation response to H<sub>2</sub>O<sub>2</sub> was abolished by administration with LY294002 (25 µM).

#### **Akt level was participated in the protection of RA in HAEC.**

Fig. 7 describes that phosphorylations of Ser473-Akt and Akt were greatly decreased in H<sub>2</sub>O<sub>2</sub>-treated HAEC compared with controls, but significantly elevated in RA-treated from HAEC cells. In contrast, after pretreatment with RA (50µM) phosphorylations of Ser473 - Akt and Akt levels were unchanged compared with controls, respectively. In addition, the phosphoinositide 3-kinase (PI 3-K)/Akt intracellular signalling pathway inhibitor LY-294002 inhibited the effect of RA on Akt phosphorylation induced by H<sub>2</sub>O<sub>2</sub>. Suggesting that RA accelerated the serine phosphorylations of Akt and eNOS inH<sub>2</sub>O<sub>2</sub>-induced damage in HAEC, which was abolished by Akt inhibitor(LY294002).

### **Discussion**

As shown in our study, treatment with RA strikingly attenuated H<sub>2</sub>O<sub>2</sub>-induced damage of aortic vascular tone in mice. This favorable effect of RA was abolished by PI3K/Akt inhibitor LY294002, indicating that RA revealed a positive-regulatory role against the actions of H<sub>2</sub>O<sub>2</sub> involving the PI3K/Akt-eNOS signaling pathway. These findings have given strong support to the concept that the beneficial effects of RA on aortic vascular tone are likely due to activation of phosphorylation of Ser473-Akt in mice. In contrast, in endothelial cells from LY294002 treatment, H<sub>2</sub>O<sub>2</sub> induced activation of Akt phosphorylation was abolished, supporting the role of Akt in RA-mediated aortic vascular tone and endothelial cells protection. Thus, diminished expression of Akt observed in the current study may be, at least in part, responsible for reduced phosphorylations of Ser473-Akt in the HAEC. Generalising from the results, RA may act as a “good Regulatory” in the vasculature, serving to modulate the abnormal aortic vascular tone in response to H<sub>2</sub>O<sub>2</sub> and acetylcholine by enhancing the phosphorylations of Ser473-Akt, suggesting that RA may be an important regulator of vascular function and exert a protective role in H<sub>2</sub>O<sub>2</sub>-induced endothelial cells impaired.
